# Supplementary material
Source: Research Square preprint supplement (doi:10.21203/rs.3.rs-9076912/v1)
Supplement: Supplementary file 1 [file 28613276bf2e311f13812bd3.docx]

**PathoScribe: Transforming Pathology Data into a Living Library with a Unified LLM-Driven Framework for Semantic Retrieval and Clinical Integration**

**Supplementary Materials**

***Supplementary Table S1:*** *Recall of target report for keyword-based query vs natural language-based query.*

| **Retrieval Method** | **Recall @ 1** | **Recall @ 3** | **Recall @ 10** |
| --- | --- | --- | --- |
| **Keyword Query (traditional)** | 0.1875 | 0.3125 | 0.40625 |
| **Natural Language Query (PathoScribe)** | 0.8125 | 0.90625 | 1.0 |

***Supplementary Table S2:*** *Cosine-similarity diagnostics for target report alignment. Similarities use cosine between the query embedding and (i) the target document embedding and (ii) the best-matching chunk embedding in the target report. Best chunk score (top-100) is the maximum similarity among retrieved top-k chunks that belong to the target report.*

| **Model** | **Pool** |  |  | **Best chunk score (top-100)** |
| --- | --- | --- | --- | --- |
| **PathologyBERT** | CLS | 0.933 [0.930, 0.935] | 0.937 [0.934, 0.940] | 0.954 [0.948, 0.959] |
| **PathologyBERT** | MEAN | 0.599 [0.579, 0.619] | 0.660 [0.636, 0.682] | 0.744 [0.729, 0.760] |
| **e5-large-v2** | CLS | 0.834 [0.829, 0.839] | 0.848 [0.841, 0.855] | 0.855 [0.850, 0.860] |
| **e5-large-v2** | MEAN | 0.858 [0.855, 0.861] | 0.864 [0.859, 0.868] | 0.869 [0.865, 0.873] |
| **bge-m3** | CLS | 0.771 [0.761, 0.780] | 0.759 [0.744, 0.774] | 0.787 [0.775, 0.799] |
| **bge-m3** | MEAN | 0.847 [0.841, 0.852] | 0.880 [0.872, 0.888] | 0.905 [0.899, 0.911] |
| **S-PubMedBert-MS-MARCO** | CLS | 0.984 [0.983, 0.985] | 0.983 [0.981, 0.984] | 0.985 [0.984, 0.986] |
| **S-PubMedBert-MS-MARCO** | MEAN | 0.973 [0.971, 0.974] | 0.970 [0.967, 0.973] | 0.975 [0.973, 0.977] |

***Supplementary Table S3:*** *Doc-level retrieval quality (FAISS dense-doc index; K = 200). Bold indicates the best (highest) mean across all model and pooling configurations within each column. Metrics are reported through R@20.*

| **Model** | **Pool** | **MRR@200** | **nDCG@200** | **R@1** | **R@5** | **R@10** | **R@20** |
| --- | --- | --- | --- | --- | --- | --- | --- |
| **PathologyBERT** | CLS | 0.001 [0.000, 0.003] | 0.013 [0.005, 0.022] | 0.000 [0.000, 0.000] | 0.000 [0.000, 0.000] | 0.000 [0.000, 0.000] | 0.009 [0.000, 0.028] |
| **PathologyBERT** | MEAN | 0.033 [0.011, 0.063] | 0.083 [0.055, 0.116] | 0.019 [0.000, 0.047] | 0.038 [0.009, 0.075] | 0.066 [0.019, 0.113] | 0.104 [0.047, 0.160] |
| **e5-large-v2** | CLS | 0.503 [0.419, 0.584] | 0.585 [0.512, 0.655] | 0.396 [0.302, 0.491] | 0.613 [0.519, 0.708] | 0.708 [0.613, 0.792] | 0.745 [0.660, 0.821] |
| **e5-large-v2** | MEAN | 0.529 [0.447, 0.610] | 0.612 [0.541, 0.682] | 0.425 [0.330, 0.519] | 0.613 [0.519, 0.708] | 0.717 [0.632, 0.802] | 0.783 [0.698, 0.858] |
| **bge-m3** | CLS | 0.503 [0.419, 0.584] | 0.580 [0.505, 0.652] | 0.396 [0.302, 0.491] | 0.604 [0.509, 0.698] | 0.698 [0.613, 0.783] | 0.745 [0.660, 0.830] |
| **bge-m3** | MEAN | 0.259 [0.190, 0.333] | 0.351 [0.285, 0.419] | 0.189 [0.113, 0.264] | 0.330 [0.245, 0.425] | 0.415 [0.321, 0.509] | 0.491 [0.396, 0.585] |
| **S-PubMedBert-MS-MARCO** | CLS | 0.413 [0.333, 0.494] | 0.509 [0.438, 0.579] | 0.311 [0.226, 0.406] | 0.538 [0.443, 0.632] | 0.604 [0.509, 0.698] | 0.642 [0.547, 0.726] |
| **S-PubMedBert-MS-MARCO** | MEAN | 0.387 [0.311, 0.465] | 0.490 [0.423, 0.557] | 0.274 [0.189, 0.358] | 0.519 [0.425, 0.613] | 0.594 [0.500, 0.689] | 0.698 [0.604, 0.783] |

***Supplementary Table S4:*** *Chunk-level retrieval quality (FAISS dense-chunk index; K = 200). Bold indicates the best (highest) mean across all model and pooling configurations within each column. Metrics are reported through R@20.*

| **Model** | **Pool** | **MRR@200** | **nDCG@200** | **R@1** | **R@5** | **R@10** | **R@20** |
| --- | --- | --- | --- | --- | --- | --- | --- |
| **PathologyBERT** | CLS | 0.007 [0.001, 0.018] | 0.020 [0.007, 0.037] | 0.000 [0.000, 0.000] | 0.009 [0.000, 0.028] | 0.019 [0.000, 0.047] | 0.028 [0.000, 0.066] |
| **PathologyBERT** | MEAN | 0.115 [0.066, 0.170] | 0.178 [0.128, 0.234] | 0.075 [0.028, 0.132] | 0.132 [0.075, 0.198] | 0.208 [0.132, 0.292] | 0.255 [0.170, 0.340] |
| **e5-large-v2** | CLS | 0.554 [0.468, 0.638] | 0.619 [0.542, 0.693] | 0.481 [0.387, 0.575] | 0.623 [0.528, 0.717] | 0.679 [0.585, 0.764] | 0.745 [0.660, 0.830] |
| **e5-large-v2** | MEAN | 0.539 [0.451, 0.626] | 0.599 [0.520, 0.677] | 0.491 [0.396, 0.585] | 0.575 [0.481, 0.670] | 0.642 [0.547, 0.736] | 0.745 [0.660, 0.821] |
| **bge-m3** | CLS | 0.345 [0.265, 0.428] | 0.421 [0.345, 0.498] | 0.292 [0.208, 0.377] | 0.415 [0.321, 0.509] | 0.462 [0.368, 0.557] | 0.519 [0.425, 0.613] |
| **bge-m3** | MEAN | 0.310 [0.229, 0.393] | 0.362 [0.284, 0.441] | 0.274 [0.189, 0.358] | 0.349 [0.264, 0.443] | 0.377 [0.283, 0.472] | 0.425 [0.330, 0.519] |
| **S-PubMedBert-MS-MARCO** | CLS | 0.410 [0.327, 0.492] | 0.488 [0.412, 0.563] | 0.330 [0.245, 0.415] | 0.472 [0.377, 0.566] | 0.547 [0.453, 0.642] | 0.613 [0.519, 0.708] |
| **S-PubMedBert-MS-MARCO** | MEAN | 0.414 [0.329, 0.499] | 0.488 [0.411, 0.565] | 0.349 [0.255, 0.443] | 0.472 [0.377, 0.566] | 0.538 [0.443, 0.632] | 0.623 [0.528, 0.717] |

***Supplementary Table S5:*** *IHC panel recommendation: overall and organ-stratified performance (PathoScribe vs LLM-only). All values are percentages (%). Bracketed intervals are paired bootstrap 95% CIs (2,000 iterations). BR@5: budgeted recall within the top-5 markers. Organ-stratified values are macro means within each organ.*

***A.*** *System-level performance (n = 270)*

| **Metric** | **PathoScribe** | **LLM-only** | **∆ (PathoScribe-LLM)** |
| --- | --- | --- | --- |
| **Ranking / early-hit behavior** | | | |
| **Hit@1** | 57.4 [51.5, 63.3] | 11.9 [8.1, 15.9] | +45.6 [38.9, 52.2] |
| **Hit@3** | 76.7 [71.5, 81.9] | 44.8 [38.9, 50.4] | +31.9 [25.2, 38.5] |
| **Hit@5** | 83.7 [79.3, 88.1] | 64.4 [58.5, 70.0] | +19.3 [13.3, 25.6] |
| **BR@5** | 60.8 [56.4, 65.2] | 36.9 [32.7, 41.3] | +23.9 [18.3, 29.5] |
| **Set agreement (marker overlap)** | | | |
| **Precision** | 40.9 [37.5, 44.3] | 23.3 [20.8, 25.9] | +17.6 [14.5, 20.9] |
| **Recall** | 65.0 [60.6, 69.5] | 42.6 [38.3, 47.1] | +22.3 [17.2, 27.5] |
| **Macro F1** | 46.1 [42.8, 49.3] | 27.7 [25.0, 30.5] | +18.3 [14.9, 21.8] |
| **Jaccard** | 34.2 [31.3, 37.2] | 18.4 [16.3, 20.5] | +15.8 [12.9, 18.9] |

***B.*** *Organ-stratified macro performance (95% CIs)*

| **Organ** | **n** | **F1** | **Hit@1** | **Hit@3** | **Hit@5** | **BR@5** |
| --- | --- | --- | --- | --- | --- | --- |
| **LLM-only [95% CI] → PathoScribe [95% CI]** | | | | | | |
| **Breast** | 49 | 24.9 [19.6, 30.3] → 49.9 [44.1, 55.9] | 2.0 [0.0, 6.1] → 81.6 [71.4, 91.8] | 26.5 [14.3, 38.8] → 95.9 [89.8, 100.0] | 61.2 [46.9, 73.5] → 95.9 [89.8, 100.0] | 29.9 [21.0, 39.2] → 77.9 [69.5, 85.5] |
| **Colon** | 57 | 22.0 [16.3, 28.1] → 45.7 [37.2, 54.1] | 15.8 [7.0, 26.3] → 50.9 [36.8, 63.2] | 36.8 [24.6, 49.1] → 70.2 [57.9, 80.7] | 50.9 [38.6, 63.2] → 75.4 [63.2, 86.0] | 30.8 [22.0, 40.6] → 56.9 [46.5, 66.9] |
| **Kidney** | 36 | 27.4 [20.5, 34.7] → 51.0 [41.6, 59.9] | 5.6 [0.0, 13.9] → 55.6 [38.9, 72.2] | 58.3 [41.7, 75.0] → 77.8 [63.9, 88.9] | 69.4 [55.6, 83.3] → 86.1 [75.0, 97.2] | 28.6 [21.1, 36.2] → 58.1 [47.4, 68.5] |
| **Liver** | 16 | 33.1 [20.3, 46.7] → 40.6 [25.4, 55.9] | 12.5 [0.0, 31.3] → 50.0 [25.0, 75.0] | 37.5 [12.5, 62.5] → 62.5 [37.5, 87.5] | 68.8 [43.8, 87.5] → 68.8 [43.8, 87.5] | 49.6 [29.7, 69.3] → 57.9 [36.8, 78.4] |
| **Lung** | 77 | 31.7 [26.5, 36.9] → 41.9 [36.6, 47.7] | 14.3 [6.5, 23.4] → 51.9 [40.3, 62.4] | 57.1 [46.8, 68.8] → 71.4 [61.0, 81.8] | 70.1 [59.7, 80.5] → 84.4 [76.6, 92.2] | 43.6 [35.2, 52.1] → 54.2 [46.6, 62.1] |
| **Skin** | 28 | 28.6 [20.2, 37.5] → 48.8 [38.8, 58.5] | 17.9 [3.6, 32.1] → 53.6 [35.7, 71.4] | 42.9 [25.0, 60.7] → 78.6 [60.7, 92.9] | 67.9 [50.0, 85.7] → 85.7 [71.4, 96.4] | 44.6 [29.8, 59.5] → 63.3 [49.2, 76.5] |

***Supplementary Table S6:*** *Reference-based overlap and semantic alignment across report renderings. Values are mean [95% CI]. Higher is better for all metrics. ROUGE and BLEU are computed against available reference rewrites (clinical, oncologist, tumor-board: n=50; patient-friendly: n=13; CAP-style synoptic: n=6). Embedding cosine similarity and PathBERTScore are computed on the full cohort (n=50). 95% CIs for continuous metrics are bootstrap CIs.*

| **Setting** | **ROUGE-1 F1** | **ROUGE-2 F1** | **ROUGE-L F1** | **BLEU-4** | **Emb. cos. Sim.** | **PathBERTScore** |
| --- | --- | --- | --- | --- | --- | --- |
| **Concise clinical summary** | 0.614 [0.585, 0.644] | 0.410 [0.377, 0.446] | 0.495 [0.461, 0.529] | 0.308 [0.271, 0.346] | 0.819 [0.796, 0.840] | 0.718 [0.701, 0.735] |
| **Oncologist-facing report** | 0.635 [0.593, 0.678] | 0.505 [0.458, 0.551] | 0.581 [0.536, 0.626] | 0.310 [0.256, 0.365] | 0.838 [0.808, 0.868] | 0.780 [0.756, 0.802] |
| **Tumor board-facing report** | 0.655 [0.621, 0.685] | 0.468 [0.437, 0.500] | 0.522 [0.491, 0.552] | 0.362 [0.329, 0.396] | 0.839 [0.803, 0.868] | 0.780 [0.759, 0.799] |
| **CAP-style synoptic** | 0.697 [0.519, 0.841] | 0.608 [0.432, 0.757] | 0.585 [0.414, 0.735] | 0.519 [0.333, 0.681] | 0.987 [0.974, 0.997] | 0.976 [0.957, 0.993] |
| **Patient-friendly report** | 0.379 [0.334, 0.414] | 0.186 [0.164, 0.202] | 0.269 [0.237, 0.294] | 0.121 [0.102, 0.138] | 0.952 [0.927, 0.975] | 0.927 [0.891, 0.961] |

***Supplementary Table S7:*** *Source-grounded retention, faithfulness guardrails, and readability. Values are mean [95% CI]. Higher is better for CSR fact coverage recall, numeric precision, auditor-supported rate, and Flesch Reading Ease; lower is better for FK grade. Metrics are computed on the full cohort (n=50). 95% CIs are bootstrap CIs for continuous metrics; Wilson intervals for proportions (numeric precision; auditor-supported rate).*

| **Setting** | **CSR fact coverage recall** | **Numeric precision** | **Auditor-supported** | **FK grade** | **Reading Ease** |
| --- | --- | --- | --- | --- | --- |
| **Concise clinical summary** | 0.602 [0.560, 0.644] | 1.000 [0.929, 1.000] | 0.740 [0.604, 0.841] | 14.27 [12.97, 15.76] | 20.01 [14.60, 24.94] |
| **Oncologist-facing report** | 0.699 [0.664, 0.733] | 1.000 [0.929, 1.000] | 0.920 [0.812, 0.968] | 12.60 [11.40, 13.82] | 25.46 [19.79, 31.09] |
| **Tumor board-facing report** | 0.650 [0.605, 0.693] | 1.000 [0.929, 1.000] | 0.700 [0.562, 0.809] | 12.73 [11.78, 13.77] | 22.32 [17.58, 26.51] |
| **CAP-style synoptic** | 0.659 [0.617, 0.701] | 1.000 [0.929, 1.000] | 0.660 [0.522, 0.776] | 14.50 [12.83, 16.42] | 11.19 [5.40, 16.62] |
| **Patient-friendly report** | 0.455 [0.421, 0.489] | 1.000 [0.929, 1.000] | 0.820 [0.692, 0.902] | 5.86 [5.54, 6.17] | 69.40 [67.08, 71.58] |

***Supplementary Table S8:*** *Number of local LLM calls and time taken to generate each cohort with average and median over all 10 generations.*

| **Cohort Number** | **Local LLM Calls** | **Time Taken (seconds)** | **Time Taken (Minutes)** |
| --- | --- | --- | --- |
| 1 | 262 | 60.723 | 1.012 |
| 2 | 1426 | 315.11 | 5.252 |
| 3 | 1555 | 356.377 | 5.94 |
| 4 | 2395 | 534.23 | 8.904 |
| 5 | 772 | 174.619 | 2.91 |
| 6 | 1278 | 283.121 | 4.719 |
| 7 | 3608 | 826.199 | 13.77 |
| 8 | 1414 | 304.001 | 5.067 |
| 9 | 2332 | 513.73 | 8.562 |
| 10 | 9446 | 2207.139 | 36.786 |
| **Average** | **2448.8** | **557.5249** | **9.2922** |
| **Median** | **1555** | **356.377** | **5.94** |

**S1 Supplementary Methods**

**S1.1 OCR Rendering and OCR Configuration**

CHTN PDFs were rendered page-wise to grayscale images at 350 dpi prior to OCR. OCR was performed with Tesseract using English language data, OEM set to 1 and PSM set to 6, with a per-page timeout of 120 seconds. Page text was optionally written to per-page TXT files and was always merged into a single document TXT file with explicit page boundary markers retained for traceability.

**S1.2 Post-OCR Normalization and Section Parsing**

Post-OCR normalization includes removal of explicit page markers, repair of hyphenation across line breaks, collapsing of broken lines while preserving paragraph structure, and whitespace normalization. Section parsing uses regular expressions over common pathology report headings, including FINAL DIAGNOSIS, DIAGNOSIS, MICROSCOPIC DESCRIPTION, GROSS DESCRIPTION, COMMENT, and IMMUNOHISTOCHEMISTRY headings. Sections are retained as labeled blocks and are used to constrain chunk boundaries.

**S1.3 Chunk Construction and JSONL Artifacts**

Section text is split into sentences using a punctuation-based boundary heuristic and then assembled into greedy chunks that respect minimum and maximum token thresholds. Chunks do not cross section boundaries. The pipeline emits (i) a document-level JSONL file containing document identifiers and provenance paths and (ii) a chunk-level JSONL file containing chunk identifiers, document identifiers, section labels, and chunk text. Chunks include a short extractive summary computed as the first three sentences of the chunk.

**S1.4 Optional Metadata and Summary Generation**

An optional step extracts document-level metadata and produces short chunk summaries using an on-premises LLM served via an OpenAI-compatible API. Metadata fields include title, accession number, date, specimen site, diagnosis, IHC markers, keywords, and a brief summary. These fields are used for indexing and user-facing display and do not alter dense retrieval scoring.

**S1.5 Hybrid Weights and Default Settings**

Hybrid retrieval uses the convex combination in hybrid-score with default weights satisfying

**S1.6 Cost Analysis of NVIDIA A100 40GB GPU On-Demand and On-Prem**

To estimate the per-hour cost of an NVIDIA A100 40GB GPU on-demand, we consulted the Amazon AWS EC2 pricing page on 03/04/2026 at 1:31 P.M. The relevant instance, p4d.24xlarge, includes 8 A100 40GB GPUs and costs approximately $21.96 per hour in the US East (Ohio) region, translating to roughly $2.74 per GPU per hour. The cost of new hardware was approximated using reports from Northflank and Jarvis Labs (2025), which estimate the price of an A100 40GB PCIe GPU at $8,000–12,000.

*(Webpages accessed: Amazon EC2 P4 Instances:* [*https://aws.amazon.com/ec2/instance-types/p4/*](https://aws.amazon.com/ec2/instance-types/p4/)*; Amazon EC2 On-Demand Pricing:* [*https://aws.amazon.com/ec2/pricing/on-demand/*](https://aws.amazon.com/ec2/pricing/on-demand/)*; Northflank Article:* [*https://northflank.com/blog/nvidia-a100-gpu-cost*](https://northflank.com/blog/nvidia-a100-gpu-cost)*; Jarvis Labs Article:* [*https://jarvislabs.ai/ai-faqs/nvidia-a100-gpu-price*](https://jarvislabs.ai/ai-faqs/nvidia-a100-gpu-price)*)*
